# Supplementary material for: Differential immune landscapes in appendicular versus axial skeleton
Source: PubMed Central journal article supplement (PMC9045623; doi:10.1371/journal.pone.0267642), 2022-04-27
Supplement: pone.0267642.s004.pdf [file pone.0267642.s004.pdf]

**S1 File. Bone Marrow Cytokine Analysis**

|                        | Ossicle A   | Ossicle B | Ossicle C   | Vossicle A  | Vossicle B | Vossicle C |
|------------------------|-------------|-----------|-------------|-------------|------------|------------|
| <b>6Ckine/Exodus 2</b> |             |           |             |             |            |            |
| Eotaxin                | 62.95230769 | 80.66     | 149.3907692 | 54.43826087 | 63.854     | 20.49      |
| EPO                    | 0           | 0         | 0           | 28.82782609 | 13.524     | 30.735     |
| Fractalkine            | 55.69461538 | 45.57     | 50.59461538 | 38.48       | 172.06     | 116.58     |
| G-CSF                  | 24.54538462 | 17.43     | 3.870769231 | 9.346521739 | 16.73      | 4.215      |
| GM-CSF                 | 0           | 0         | 0           | 0           | 2.618      | 0          |
| IFN $\beta$ -1         | 72.77307692 | 46.47     | 72.77307692 | 53.40869565 | 24.416     | 38.355     |
| IFN $\gamma$           | 0.836923077 | 1.58      | 1.974615385 | 1.029565217 | 5.712      | 9.345      |
| IL-10                  | 3.713846154 | 6.82      | 6.015384615 | 12.58       | 40.614     | 30.66      |
| IL-11                  |             |           |             |             |            |            |
| IL-12p40               | 0           | 0.78      | 0           | 174.2378261 | 87.906     | 145.29     |
| IL-12p70               | 0           | 0         | 0           | 0           | 1.82       | 0          |
| IL-13                  | 0.287692308 | 0.11      | 0.026153846 | 12.40304348 | 2.478      | 0.78       |
| IL-15                  | 13.03769231 | 9.97      | 16.93461538 | 21.63695652 | 39.494     | 53.46      |
| IL-16                  | 9707.143846 | 9837.97   | 7444.195385 | 4654.455217 | 4209.226   | 3029.19    |
| IL-17                  | 0.313846154 | 0.45      | 0.392307692 | 2.91173913  | 1.652      | 6          |
| IL-1 $\alpha$          | 91.72153846 | 83.75     | 74.66923077 | 556.9143478 | 341.824    | 364.545    |
| IL-1 $\beta$           | 3.086153846 | 1.07      | 3.373846154 | 2.429130435 | 4.186      | 13.755     |
| IL-2                   | 12.16153846 | 14.27     | 11.99153846 | 36.08304348 | 51.156     | 55.725     |
| IL-20                  |             |           |             |             |            |            |
| IL-3                   | 0.666923077 | 0.67      | 0.876153846 | 0.514782609 | 0.714      | 0.675      |
| IL-4                   | 0.431538462 | 0.26      | 0.496923077 | 0.289565217 | 0.336      | 0.255      |
| IL-5                   | 0.130769231 | 0.17      | 0.51        | 0           | 0.63       | 0          |
| IL-6                   | 3.962307692 | 3.65      | 3.596153846 | 18.27478261 | 15.904     | 21.39      |
| IL-7                   | 2.876923077 | 3.2       | 3.06        | 7.496521739 | 4.676      | 16.32      |
| IL-9                   | 13.92692308 | 17.96     | 25.44769231 | 170.4091304 | 55.342     | 111.15     |
| IP-10                  | 9.493846154 | 15.21     | 15.56153846 | 18.27478261 | 12.866     | 16.155     |
| KC                     | 26.59846154 | 21.63     | 16.51615385 | 75.72130435 | 34.146     | 33.885     |
| LIF                    | 2.013846154 | 2.9       | 2.824615385 | 1.512173913 | 2.506      | 2.415      |
| LIX                    | 98.19461538 | 110.94    | 336.2469231 | 0           | 0          | 0          |
| MCP-1                  | 0.470769231 | 4.34      | 3.439230769 | 8.799565217 | 5.278      | 5.655      |
| MCP-5                  | 76.57846154 | 80.62     | 59.10769231 | 64.65347826 | 107.184    | 93.84      |
| M-CSF                  | 7.754615385 | 8.65      | 11.86076923 | 1.89826087  | 6.678      | 6.96       |
| MDC                    | 13.22076923 | 24.69     | 31.96       | 11.90434783 | 22.218     | 7.455      |
| MIG                    | 311.0738462 | 662.36    | 305.7646154 | 77.76434783 | 63.434     | 27.435     |
| MIP-1B                 | 0           | 0         | 0           | 0           | 0          | 0          |
| MIP-1 $\alpha$         | 0           | 12.02     | 0           | 37.88478261 | 37.408     | 28.92      |
| MIP-2                  | 16.22846154 | 97.19     | 147.8476923 | 220.7613043 | 312.144    | 459.57     |
| MIP-3 $\alpha$         | 1.830769231 | 2.05      | 1.778461538 | 5.517826087 | 3.08       | 8.805      |
| MIP-3 $\beta$          | 44.71       | 29.13     | 42.21230769 | 55.46782609 | 68.558     | 49.635     |
| RANTES                 | 6.734615385 | 15.65     | 14.71153846 | 3.667826087 | 2.94       | 2.295      |
| TARC                   | 18.12461538 | 18.89     | 36.48461538 | 20.52695652 | 18.774     | 20.19      |
| TIMP-1                 | 5592.463846 | 9644.93   | 4701.964615 | 3485.383913 | 7281.75    | 4178.295   |
| TNF $\alpha$           | 0           | 0         | 0           | 0           | 0          | 0          |
| VEGF                   | 23.53846154 | 15.12     | 36.23615385 | 31.88434783 | 10.248     | 21.675     |
